# Supplementary material for: Immune Features of COVID-19 Convalescent Individuals Revealed by a Single-cell RNA Sequencing
Source: Research Square preprint supplement (doi:10.21203/rs.3.rs-898487/v1), 2021-10-01
Supplement: Supplementary file 1 [file 82eb3c7349b2262d5aa95ae1.docx]

Supplementary Table 1. The laboratory findings of enrolled convalescent patients with moderate COVID-19.

|  | Convalescent patients with moderate  COVID-19 (n=5) | Convalescent patients with severe COVID-19 (n=8) | Healthy donor （n=5） | *P* value |
| --- | --- | --- | --- | --- |
| Age (Mean, ±SD) | 35.4（±4.1） | 40.3（±7.7） | 28.8（±1.2） | 0.069 |
| Male (%) | 0.8 | 0.75 | 1 | 0.487 |
| ARDS (%) | 0 | 0.0125 | - | 1 |
| Myalgia (%) | 0.2 | 0 | - | 0.385 |
| Fever (%) | 0.4 | 1 | - | 0.035 |
| Cough (%) | 0.2 | 0 | - | 0.385 |
| Pulmonary infltrating shadow (%) | 0.2 | 0 | - | 0.385 |
| Methylprednisolone (%) | 0.2 | 0.875 | - | 0.032 |
| Oseltamivir (%) | 0.8 | 1 | - | 0.385 |
| Days in hospital | 25.2（±10.9） | 43（±32.4） | - | 0.353 |
| Leukocytes count (×109 L-1) | 6.24（±1.01） | 6.6（±2.23） | - | 0.762 |
| Neutrophils count (×109 L-1) | 3.56（±0.85） | 4.6（±1.92） | - | 0.316 |
| Lymphocytes count (×109 L-1) | 2.04（±0.24） | 1.45（±0.24） | - | 0.003 |
| Monocytes (×109 L-1) | 0.56（±0.18） | 0.49（±0.19） | - | 0.574 |
| Hemoglobin (g L-1) | 142.9（±8.53） | 133.94（±6.99） | - | 0.084 |
| Platelets count (×109 L-1) | 223.4（±27.04） | 200.25（±38.7） | - | 0.304 |
| ALT (U L-1) | 35.1（±21.6） | 54.25（±15.13） | - | 0.113 |
| AST (U L-1) | 22（±6.61） | 29.19（±6.48） | - | 0.103 |
| Albumin (g L-1) | 42.81（±1.52） | 37.48（±1.89） | - | 0.000 |
| Total bilirubin (μmol L-1) | 13.72（±7.14） | 12.66（±3.84） | - | 0.755 |
| Serum creatinine (μmol L-1) | 63.5（±14.9） | 62.94（±12.16） | - | 0.947 |
| Glucose | 4.82（±0.6） | 5.06（±0.57） | - | 0.520 |
| Sodium | 130.27（±25.41） | 139.86（±2.18） | - | 0.350 |
| Potassium | 3.95（±0.14） | 4（±0.27） | - | 0.725 |
| Calcium | 2.2（±0.07） | 2.14（±0.07） | - | 0.204 |
| pH | - | 7.43（±0.04） | - |  |
| PaO2 | - | 80.94（±19.62） | - |  |
| PaCO2 | - | 40.19（±6.08） | - |  |
| SaO2 | - | 91.75（±8.16） | - |  |
| Lactate dehydrogenase (U L−1) | - | 2.21（±0.75） | - |  |
| Prothrombin time (s) | 0.03（±0.01） | 0.05（±0.04） | - | 0.263 |
| CK-MB | - | 0.82（±0.81） | - |  |
| Highly-sensitive troponin I | - | 0.008（±0.002） | - |  |
| PT-INR | - | 0.925（±0.036） | - |  |
| D-dimer (μg L−1) | - | 0.99（±0.66） | - |  |
